# Supplementary material for: Healing of osteoporotic bone defects by micro-/nano-structured calcium phosphate bioceramics
Source: Royal Society of Chemistry journal article supplement (doi:10.1039/c8nr09417a), 2019-01-01
Supplement: c8nr09417a1.pdf [file c8nr09417a1.pdf]

## Supporting Information

### Healing of osteoporotic bone defects by micro-/nano-structured calcium phosphate bioceramics

Rui Zhao<sup>1</sup>, Siyu Chen<sup>1</sup>, Bo Yuan<sup>1</sup>, Xuening Chen<sup>1</sup>, Xi Yang<sup>2</sup>, Yueming Song<sup>2</sup>, Hai  
Tang<sup>3</sup>, Xiao Yang<sup>1,\*</sup>, Xiangdong Zhu<sup>1,\*</sup>, Xingdong Zhang<sup>1</sup>

<sup>1</sup> National Engineering Research Center for Biomaterials, Sichuan University,  
Chengdu, 610064, China

<sup>2</sup>Department of Orthopaedics, West China Hospital of Sichuan University,  
Chengdu 610041, China

<sup>3</sup>Department of Orthopedics, Beijing Friendship Hospital, Capital Medical University,  
Beijing 100050, China

\*Corresponding Authors

Tel.: 86-28-85417654;

Fax: 86-28-85410246

E-mail address:

xiaoyang114@scu.edu.cn (Xiao Yang) and zxd7303@163.com (Xiangdong Zhu)

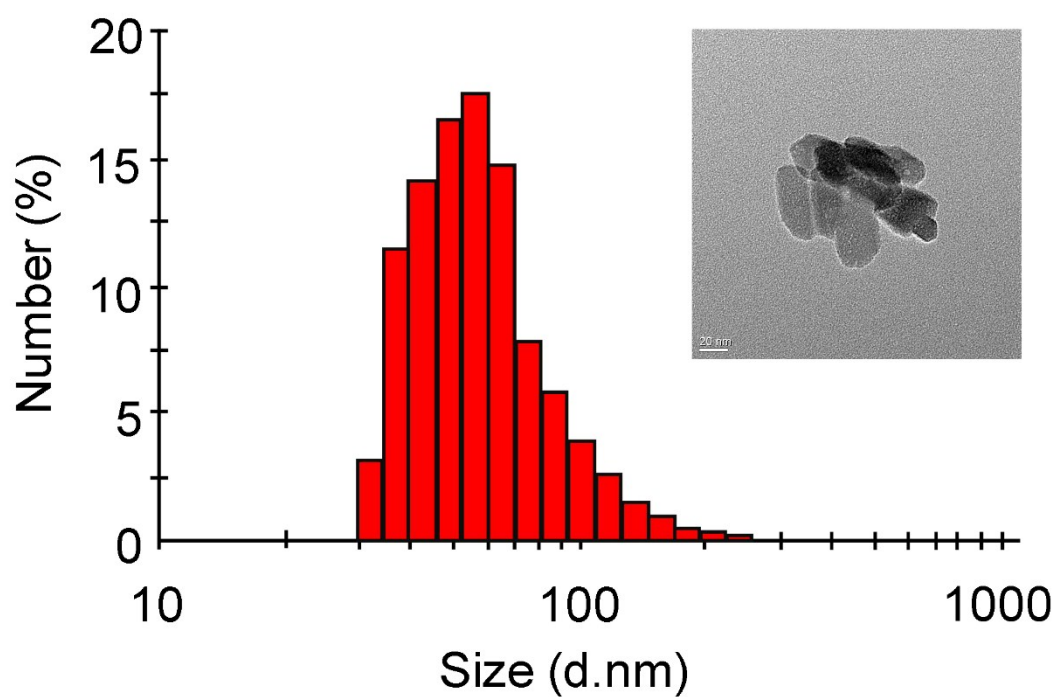

**Fig. S1** TEM images of the CaP nanoparticles and particle size distributions.

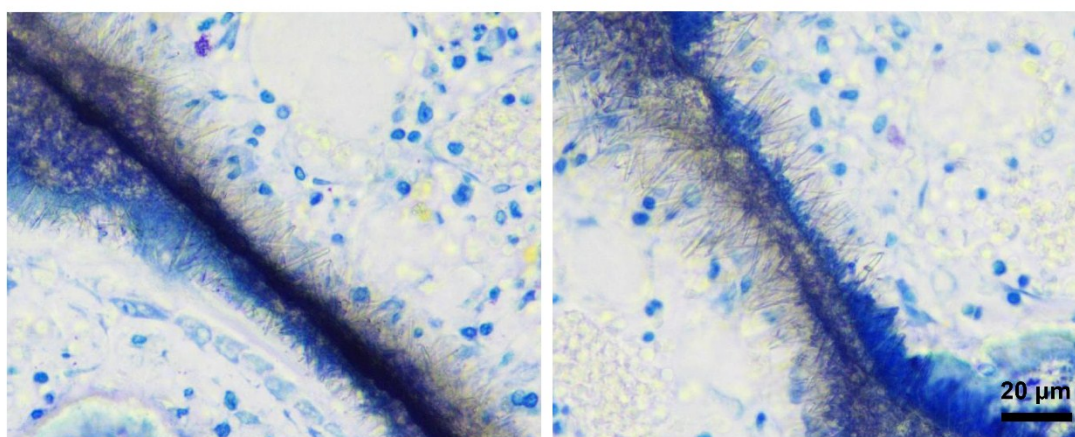

**Fig. S2** Toluidine blue (TB) staining images of the cells cultured on the wCaP bioceramics.

### Adjacent bone

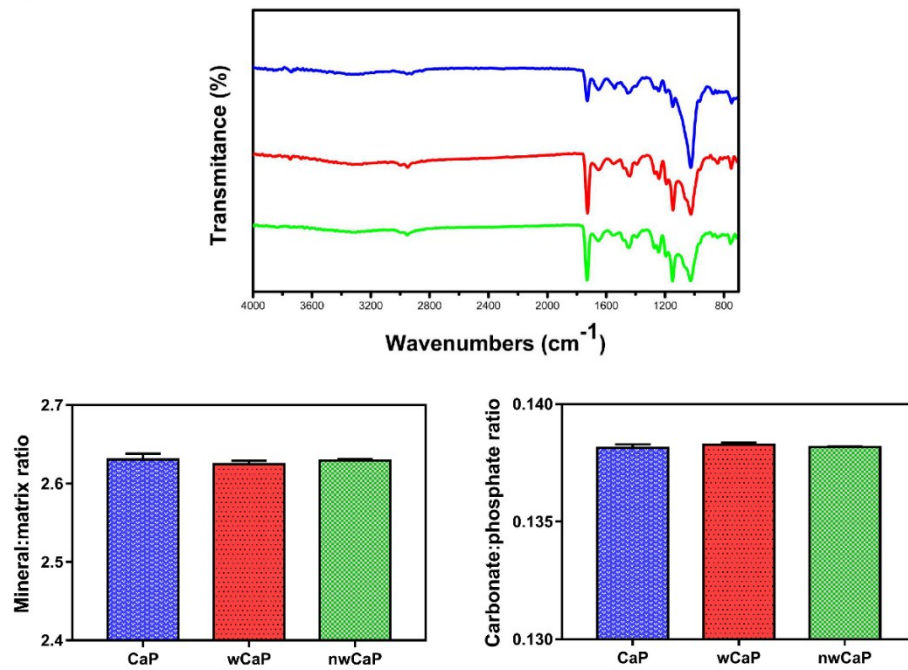

### Implanted material

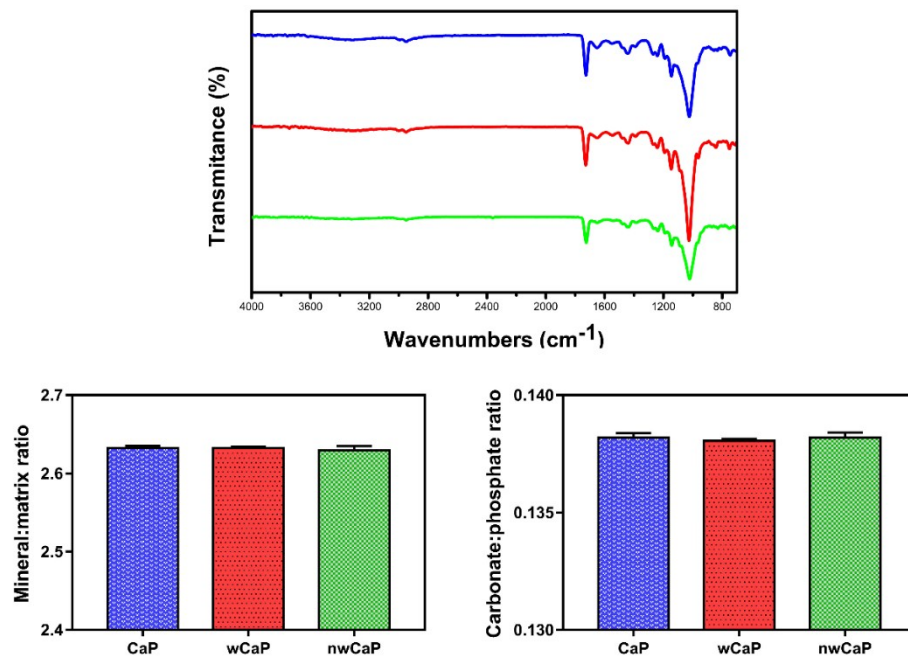

**Fig. S3** Fourier transform infrared (FTIR) spectroscopy of the adjacent bone and the implanted material. The analyses refer to specimens from CaP, wCaP and nwCaP. Each sample was baseline corrected from 1850 to 1950  $\text{cm}^{-1}$ .<sup>1</sup> No significant inter-

group difference was revealed by FTIR spectra of bone matrix and the implanted material, in terms of carbonate to phosphate ratio and the mineral to matrix ratio.

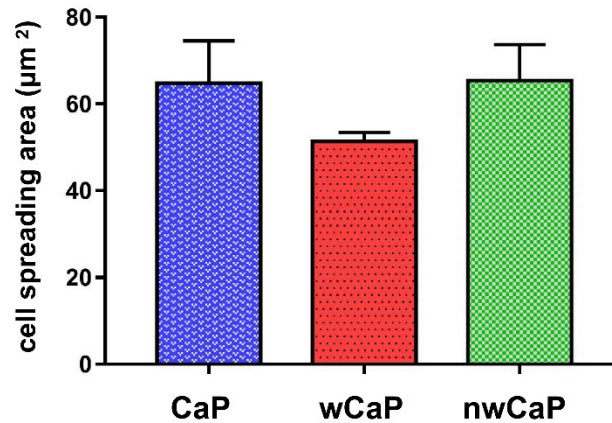

**Fig. S4** The cell spreading area on the different bioceramics quantified by CLSM images.

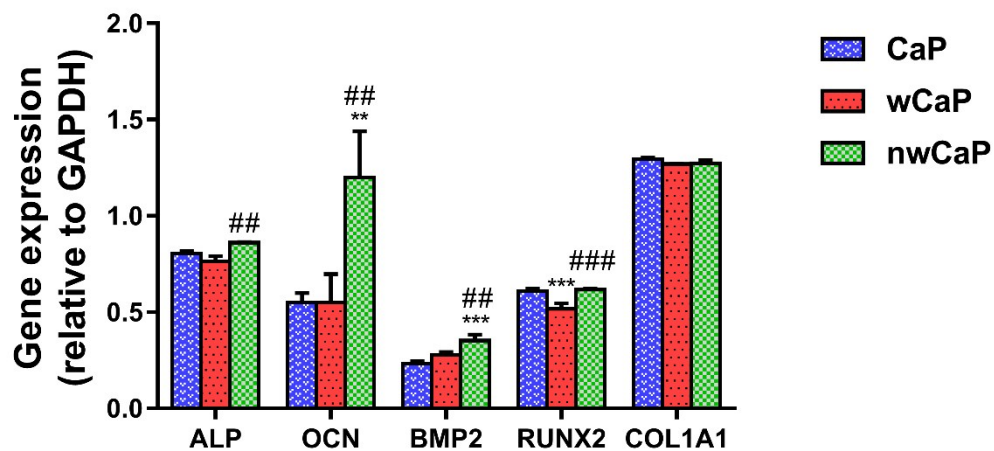

**Fig. S5** qRT-PCR analysis for the osteogenic gene expressions in MSCs cultured with the CaP, wCaP and nwCaP bioceramics. (n = 3, \* $p$  < 0.05 vs the CaP group, \*\* $p$  < 0.01 vs the CaP group, \*\*\* $p$  < 0.001 vs the CaP group; # $p$  < 0.05 vs the wCaP group, ## $p$  < 0.01 vs the wCaP group, ### $p$  < 0.001 vs the wCaP group).

## References

1. Milovanovic, P.; Zimmermann, E. A.; Riedel, C.; Scheidt, A. V.; Herzog, L.;

Krause, M.; Djonic, D.; Djuric, M.; Püschel, K.; Amling, M., Multi-level characterization of human femoral cortices and their underlying osteocyte network reveal trends in quality of young, aged, osteoporotic and antiresorptive-treated bone. *Biomaterials* **2015**, *45*, 46-55.
